# Supplementary material for: Biodiversity and Structural Analysis of Woody Plant Species of Home Gardens in Basona Worana District, North Shoa Zone of Central Ethiopia
Source: Hindawi journal article supplement (doi:10.1155/2024/5563636), 2024-02-08

Supplementary file 1: Photos taken while the researcher was taking data at HGs of three kebeles of Basona-Worena District (Photos of a) and b) showing while measuring the diameters of trees at breast height, c) showing while measuring the diameter of a tree crown)

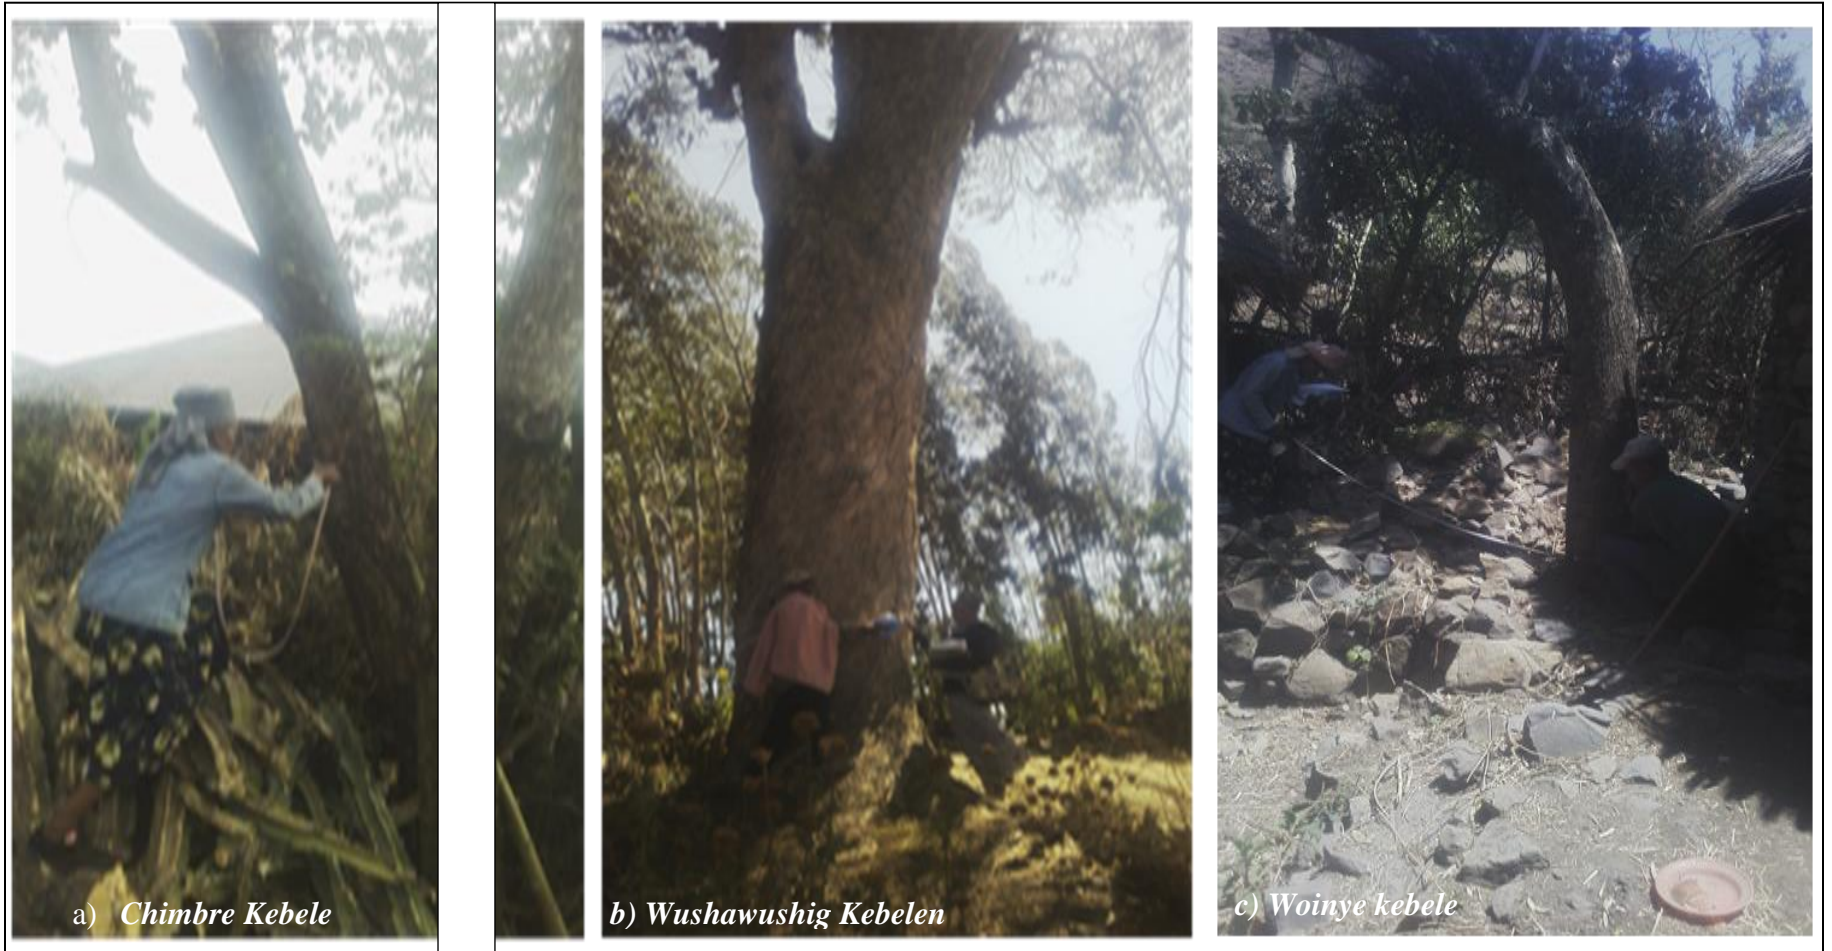

Supplement: f1 [file 5563636.f1.pdf]
